# Supplementary material for: Anabaenolysins, Novel Cytolytic Lipopeptides from Benthic Anabaena Cyanobacteria
Source: PLOS journal article supplement (doi:10.1371/journal.pone.0041222), 2012-07-19
Supplement: S11 (10.1371/journal.pone.0041222.s011) [file journal.pone.0041222.s011]

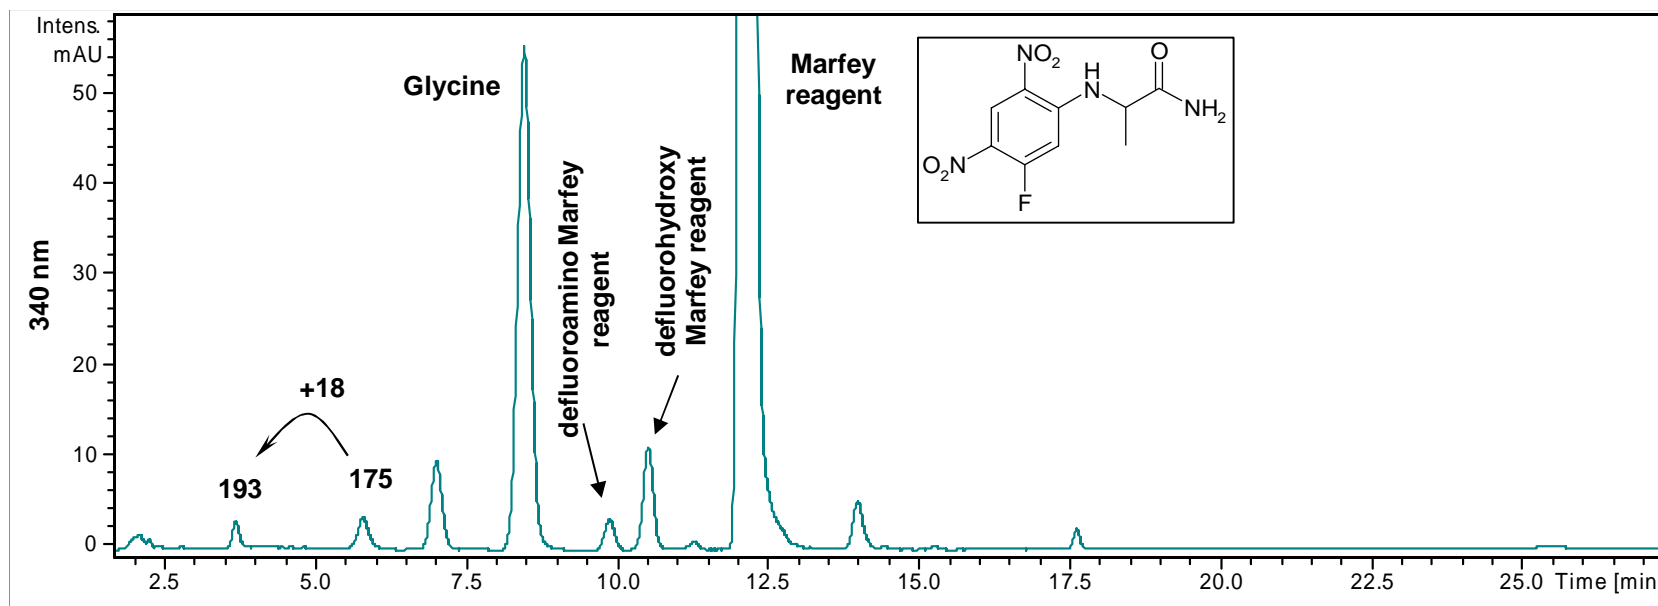

**Figure S11.** UV (340nm) chromatogram of the Marfey derivatised amino acids from the hydrolysis of anabaenolysin A. Glycine was identified by comparing the retention time and mass spectra (MS and MSn) to the FDAA-glycine prepared from commercial amino acid. 175Da and 193 Da peaks correspond to the AOFHA structure with closed and open lactone ring structure.
